# Supplementary material for: Effects of Coix Seed Extract, Bifidobacterium BPL1, and Their Combination on the Glycolipid Metabolism in Obese Mice
Source: Front Nutr. 2022 Jul 18;9:939423. doi: 10.3389/fnut.2022.939423 (PMC9341295; doi:10.3389/fnut.2022.939423)
Supplement: Supplementary Material 2 — Metabolic Software Calculations.xlsx. [file Table_1.XLSX]

## Sheet: Input Data
Metabolic Software Calculations
This is used for caculating Caloremetry values with animal's exact LBM.Only one animal at a time! Copy from your exported data file into colume below. Input your aimed value of Body Weight and LBM respectively in Input Data2 Attention: Before exporting data from PhenoMaster software. Please go View-Decimal Places-Change O2 CO2's decimal places to 3!
Date	Time	Animal No.	Box	FlowSamp	Ref O2	Ref CO2	Flow	Temp	O2	CO2	dO2	dCO2	VO2(1)	VO2(2)	VO2(3)	VCO2(1)	VCO2(2)	VCO2(3)	RER	EE2	EE3	EE1
				l/min	%	%	[l/min]	[°C]	[%]	[%]	[%]	[%]	[ml/h/kg]	[ml/h/kg]	[ml/h]	[ml/h/kg]	[ml/h/kg]	[ml/h]		[kcal/h/kg]	[kcal/h/kg]	[kcal/h]

## Sheet: Input Data2
Box	Animal No.	Body Weight	LBM	CVO2	CVCO2
		[g]
n	n	77.8	0.63	3.941	1.106		Only change content of Colume3, others will follow
		77.8	0.63	3.941	1.106
		77.8	0.63	3.941	1.106
		77.8	0.63	3.941	1.106
		77.8	0.63	3.941	1.106
		77.8	0.63	3.941	1.106
		77.8	0.63	3.941	1.106
		77.8	0.63	3.941	1.106
		77.8	0.63	3.941	1.106
		77.8	0.63	3.941	1.106
		77.8	0.63	3.941	1.106
		77.8	0.63	3.941	1.106
		77.8	0.63	3.941	1.106
		77.8	0.63	3.941	1.106
		77.8	0.63	3.941	1.106
		77.8	0.63	3.941	1.106
		77.8	0.63	3.941	1.106
		77.8	0.63	3.941	1.106
		77.8	0.63	3.941	1.106
		77.8	0.63	3.941	1.106
		77.8	0.63	3.941	1.106
		77.8	0.63	3.941	1.106
		77.8	0.63	3.941	1.106
		77.8	0.63	3.941	1.106
		77.8	0.63	3.941	1.106
		77.8	0.63	3.941	1.106
		77.8	0.63	3.941	1.106
		77.8	0.63	3.941	1.106
		77.8	0.63	3.941	1.106
		77.8	0.63	3.941	1.106
		77.8	0.63	3.941	1.106
		77.8	0.63	3.941	1.106
		77.8	0.63	3.941	1.106
		77.8	0.63	3.941	1.106
		77.8	0.63	3.941	1.106
		77.8	0.63	3.941	1.106
		77.8	0.63	3.941	1.106
		77.8	0.63	3.941	1.106
		77.8	0.63	3.941	1.106
		77.8	0.63	3.941	1.106
		77.8	0.63	3.941	1.106
		77.8	0.63	3.941	1.106
		77.8	0.63	3.941	1.106
		77.8	0.63	3.941	1.106
		77.8	0.63	3.941	1.106
		77.8	0.63	3.941	1.106
		77.8	0.63	3.941	1.106
		77.8	0.63	3.941	1.106
		77.8	0.63	3.941	1.106
		77.8	0.63	3.941	1.106
		77.8	0.63	3.941	1.106
		77.8	0.63	3.941	1.106
		77.8	0.63	3.941	1.106
		77.8	0.63	3.941	1.106
		77.8	0.63	3.941	1.106
		77.8	0.63	3.941	1.106
		77.8	0.63	3.941	1.106
		77.8	0.63	3.941	1.106
		77.8	0.63	3.941	1.106
		77.8	0.63	3.941	1.106
		77.8	0.63	3.941	1.106
		77.8	0.63	3.941	1.106
		77.8	0.63	3.941	1.106
		77.8	0.63	3.941	1.106
		77.8	0.63	3.941	1.106
		77.8	0.63	3.941	1.106
		77.8	0.63	3.941	1.106
		77.8	0.63	3.941	1.106
		77.8	0.63	3.941	1.106
		77.8	0.63	3.941	1.106
		77.8	0.63	3.941	1.106
		77.8	0.63	3.941	1.106
		77.8	0.63	3.941	1.106
		77.8	0.63	3.941	1.106
		77.8	0.63	3.941	1.106
		77.8	0.63	3.941	1.106
		77.8	0.63	3.941	1.106
		77.8	0.63	3.941	1.106
		77.8	0.63	3.941	1.106
		77.8	0.63	3.941	1.106
		77.8	0.63	3.941	1.106
		77.8	0.63	3.941	1.106
		77.8	0.63	3.941	1.106
		77.8	0.63	3.941	1.106
		77.8	0.63	3.941	1.106
		77.8	0.63	3.941	1.106
		77.8	0.63	3.941	1.106
		77.8	0.63	3.941	1.106
		77.8	0.63	3.941	1.106
		77.8	0.63	3.941	1.106
		77.8	0.63	3.941	1.106
		77.8	0.63	3.941	1.106
		77.8	0.63	3.941	1.106
		77.8	0.63	3.941	1.106
		77.8	0.63	3.941	1.106
		77.8	0.63	3.941	1.106
		77.8	0.63	3.941	1.106
		77.8	0.63	3.941	1.106
		77.8	0.63	3.941	1.106
		77.8	0.63	3.941	1.106
		77.8	0.63	3.941	1.106
		77.8	0.63	3.941	1.106
		77.8	0.63	3.941	1.106
		77.8	0.63	3.941	1.106
		77.8	0.63	3.941	1.106
		77.8	0.63	3.941	1.106
		77.8	0.63	3.941	1.106
		77.8	0.63	3.941	1.106
		77.8	0.63	3.941	1.106
		77.8	0.63	3.941	1.106
		77.8	0.63	3.941	1.106
		77.8	0.63	3.941	1.106
		77.8	0.63	3.941	1.106
		77.8	0.63	3.941	1.106
		77.8	0.63	3.941	1.106
		77.8	0.63	3.941	1.106
		77.8	0.63	3.941	1.106
		77.8	0.63	3.941	1.106
		77.8	0.63	3.941	1.106
		77.8	0.63	3.941	1.106
		77.8	0.63	3.941	1.106
		77.8	0.63	3.941	1.106
		77.8	0.63	3.941	1.106
		77.8	0.63	3.941	1.106
		77.8	0.63	3.941	1.106
		77.8	0.63	3.941	1.106
		77.8	0.63	3.941	1.106
		77.8	0.63	3.941	1.106
		77.8	0.63	3.941	1.106
		77.8	0.63	3.941	1.106
		77.8	0.63	3.941	1.106
		77.8	0.63	3.941	1.106
		77.8	0.63	3.941	1.106
		77.8	0.63	3.941	1.106
		77.8	0.63	3.941	1.106
		77.8	0.63	3.941	1.106
		77.8	0.63	3.941	1.106
		77.8	0.63	3.941	1.106
		77.8	0.63	3.941	1.106
		77.8	0.63	3.941	1.106
		77.8	0.63	3.941	1.106
		77.8	0.63	3.941	1.106
		77.8	0.63	3.941	1.106
		77.8	0.63	3.941	1.106
		77.8	0.63	3.941	1.106
		77.8	0.63	3.941	1.106
		77.8	0.63	3.941	1.106
		77.8	0.63	3.941	1.106
		77.8	0.63	3.941	1.106
		77.8	0.63	3.941	1.106
		77.8	0.63	3.941	1.106
		77.8	0.63	3.941	1.106
		77.8	0.63	3.941	1.106
		77.8	0.63	3.941	1.106
		77.8	0.63	3.941	1.106
		77.8	0.63	3.941	1.106
		77.8	0.63	3.941	1.106
		77.8	0.63	3.941	1.106
		77.8	0.63	3.941	1.106
		77.8	0.63	3.941	1.106
		77.8	0.63	3.941	1.106
		77.8	0.63	3.941	1.106
		77.8	0.63	3.941	1.106
		77.8	0.63	3.941	1.106
		77.8	0.63	3.941	1.106
		77.8	0.63	3.941	1.106
		77.8	0.63	3.941	1.106
		77.8	0.63	3.941	1.106
		77.8	0.63	3.941	1.106
		77.8	0.63	3.941	1.106
		77.8	0.63	3.941	1.106
		77.8	0.63	3.941	1.106
		77.8	0.63	3.941	1.106
		77.8	0.63	3.941	1.106
		77.8	0.63	3.941	1.106
		77.8	0.63	3.941	1.106
		77.8	0.63	3.941	1.106
		77.8	0.63	3.941	1.106
		77.8	0.63	3.941	1.106
		77.8	0.63	3.941	1.106
		77.8	0.63	3.941	1.106
		77.8	0.63	3.941	1.106
		77.8	0.63	3.941	1.106
		77.8	0.63	3.941	1.106
		77.8	0.63	3.941	1.106
		77.8	0.63	3.941	1.106
		77.8	0.63	3.941	1.106
		77.8	0.63	3.941	1.106
		77.8	0.63	3.941	1.106
		77.8	0.63	3.941	1.106
		77.8	0.63	3.941	1.106
		77.8	0.63	3.941	1.106
		77.8	0.63	3.941	1.106
		77.8	0.63	3.941	1.106
		77.8	0.63	3.941	1.106
		77.8	0.63	3.941	1.106
		77.8	0.63	3.941	1.106
		77.8	0.63	3.941	1.106
		77.8	0.63	3.941	1.106
		77.8	0.63	3.941	1.106
		77.8	0.63	3.941	1.106
		77.8	0.63	3.941	1.106
		77.8	0.63	3.941	1.106
		77.8	0.63	3.941	1.106
		77.8	0.63	3.941	1.106
		77.8	0.63	3.941	1.106
		77.8	0.63	3.941	1.106
		77.8	0.63	3.941	1.106
		77.8	0.63	3.941	1.106
		77.8	0.63	3.941	1.106
		77.8	0.63	3.941	1.106
		77.8	0.63	3.941	1.106
		77.8	0.63	3.941	1.106
		77.8	0.63	3.941	1.106
		77.8	0.63	3.941	1.106
		77.8	0.63	3.941	1.106
		77.8	0.63	3.941	1.106
		77.8	0.63	3.941	1.106
		77.8	0.63	3.941	1.106
		77.8	0.63	3.941	1.106
		77.8	0.63	3.941	1.106
		77.8	0.63	3.941	1.106
		77.8	0.63	3.941	1.106
		77.8	0.63	3.941	1.106
		77.8	0.63	3.941	1.106
		77.8	0.63	3.941	1.106
		77.8	0.63	3.941	1.106
		77.8	0.63	3.941	1.106
		77.8	0.63	3.941	1.106
		77.8	0.63	3.941	1.106
		77.8	0.63	3.941	1.106
		77.8	0.63	3.941	1.106
		77.8	0.63	3.941	1.106
		77.8	0.63	3.941	1.106
		77.8	0.63	3.941	1.106
		77.8	0.63	3.941	1.106
		77.8	0.63	3.941	1.106
		77.8	0.63	3.941	1.106
		77.8	0.63	3.941	1.106
		77.8	0.63	3.941	1.106
		77.8	0.63	3.941	1.106
		77.8	0.63	3.941	1.106
		77.8	0.63	3.941	1.106
		77.8	0.63	3.941	1.106
		77.8	0.63	3.941	1.106
		77.8	0.63	3.941	1.106
		77.8	0.63	3.941	1.106
		77.8	0.63	3.941	1.106
		77.8	0.63	3.941	1.106
		77.8	0.63	3.941	1.106
		77.8	0.63	3.941	1.106
		77.8	0.63	3.941	1.106
		77.8	0.63	3.941	1.106
		77.8	0.63	3.941	1.106
		77.8	0.63	3.941	1.106
		77.8	0.63	3.941	1.106
		77.8	0.63	3.941	1.106
		77.8	0.63	3.941	1.106
		77.8	0.63	3.941	1.106
		77.8	0.63	3.941	1.106
		77.8	0.63	3.941	1.106
		77.8	0.63	3.941	1.106
		77.8	0.63	3.941	1.106
		77.8	0.63	3.941	1.106
		77.8	0.63	3.941	1.106
		77.8	0.63	3.941	1.106
		77.8	0.63	3.941	1.106
		77.8	0.63	3.941	1.106
		77.8	0.63	3.941	1.106
		77.8	0.63	3.941	1.106
		77.8	0.63	3.941	1.106
		77.8	0.63	3.941	1.106
		77.8	0.63	3.941	1.106
		77.8	0.63	3.941	1.106
		77.8	0.63	3.941	1.106
		77.8	0.63	3.941	1.106
		77.8	0.63	3.941	1.106
		77.8	0.63	3.941	1.106
		77.8	0.63	3.941	1.106
		77.8	0.63	3.941	1.106
		77.8	0.63	3.941	1.106
		77.8	0.63	3.941	1.106
		77.8	0.63	3.941	1.106
		77.8	0.63	3.941	1.106
		77.8	0.63	3.941	1.106
		77.8	0.63	3.941	1.106
		77.8	0.63	3.941	1.106
		77.8	0.63	3.941	1.106
		77.8	0.63	3.941	1.106
		77.8	0.63	3.941	1.106
		77.8	0.63	3.941	1.106
		77.8	0.63	3.941	1.106
		77.8	0.63	3.941	1.106
		77.8	0.63	3.941	1.106
		77.8	0.63	3.941	1.106
		77.8	0.63	3.941	1.106
		77.8	0.63	3.941	1.106
		77.8	0.63	3.941	1.106

## Sheet: Caculated Data
Original Data											Caculated data								Caculated Data
Date	Time	Animal No.	Box	S.Flow	Ref.O2	Ref.CO2	Flow	Temp	O2	CO2	N2 ref%	V1	V2	Body Weight	LBM	CVO2	CVCO2	Flow	dO2	dCO2	VO2(1)	VO2(2)	VO2(3)	VCO2(1)	VCO2(2)	VCO2(3)	RER	EE2	EE3	EE1
				[l/min]	[%]	[%]	[l/min]	[癈]	[%]	[%]				kg				ml/h	[%]	[%]	[ml/h/kg]	[ml/h/kg]	[ml/h]	[ml/h/kg]	[ml/h/kg]	[ml/h]		[kcal/h/kg]	[kcal/h/kg]	[kcal/h]
0	00:00:00	0	0	0	0	0	0	0	0	0	100	0	0	0.0778	0.63	3.941	1.106	0	0	0	0	0	0	0	0	0	#DIV/0!	0	0	0
0	00:00:00	0	0	0	0	0	0	0	0	0	100	0	0	0.0778	0.63	3.941	1.106	0	0	0	0	0	0	0	0	0	#DIV/0!	0	0	0
0	00:00:00	0	0	0	0	0	0	0	0	0	100	0	0	0.0778	0.63	3.941	1.106	0	0	0	0	0	0	0	0	0	#DIV/0!	0	0	0
0	00:00:00	0	0	0	0	0	0	0	0	0	100	0	0	0.0778	0.63	3.941	1.106	0	0	0	0	0	0	0	0	0	#DIV/0!	0	0	0
0	00:00:00	0	0	0	0	0	0	0	0	0	100	0	0	0.0778	0.63	3.941	1.106	0	0	0	0	0	0	0	0	0	#DIV/0!	0	0	0
0	00:00:00	0	0	0	0	0	0	0	0	0	100	0	0	0.0778	0.63	3.941	1.106	0	0	0	0	0	0	0	0	0	#DIV/0!	0	0	0
0	00:00:00	0	0	0	0	0	0	0	0	0	100	0	0	0.0778	0.63	3.941	1.106	0	0	0	0	0	0	0	0	0	#DIV/0!	0	0	0
0	00:00:00	0	0	0	0	0	0	0	0	0	100	0	0	0.0778	0.63	3.941	1.106	0	0	0	0	0	0	0	0	0	#DIV/0!	0	0	0
0	00:00:00	0	0	0	0	0	0	0	0	0	100	0	0	0.0778	0.63	3.941	1.106	0	0	0	0	0	0	0	0	0	#DIV/0!	0	0	0
0	00:00:00	0	0	0	0	0	0	0	0	0	100	0	0	0.0778	0.63	3.941	1.106	0	0	0	0	0	0	0	0	0	#DIV/0!	0	0	0
0	00:00:00	0	0	0	0	0	0	0	0	0	100	0	0	0.0778	0.63	3.941	1.106	0	0	0	0	0	0	0	0	0	#DIV/0!	0	0	0
0	00:00:00	0	0	0	0	0	0	0	0	0	100	0	0	0.0778	0.63	3.941	1.106	0	0	0	0	0	0	0	0	0	#DIV/0!	0	0	0
0	00:00:00	0	0	0	0	0	0	0	0	0	100	0	0	0.0778	0.63	3.941	1.106	0	0	0	0	0	0	0	0	0	#DIV/0!	0	0	0
0	00:00:00	0	0	0	0	0	0	0	0	0	100	0	0	0.0778	0.63	3.941	1.106	0	0	0	0	0	0	0	0	0	#DIV/0!	0	0	0
0	00:00:00	0	0	0	0	0	0	0	0	0	100	0	0	0.0778	0.63	3.941	1.106	0	0	0	0	0	0	0	0	0	#DIV/0!	0	0	0
0	00:00:00	0	0	0	0	0	0	0	0	0	100	0	0	0.0778	0.63	3.941	1.106	0	0	0	0	0	0	0	0	0	#DIV/0!	0	0	0
0	00:00:00	0	0	0	0	0	0	0	0	0	100	0	0	0.0778	0.63	3.941	1.106	0	0	0	0	0	0	0	0	0	#DIV/0!	0	0	0
0	00:00:00	0	0	0	0	0	0	0	0	0	100	0	0	0.0778	0.63	3.941	1.106	0	0	0	0	0	0	0	0	0	#DIV/0!	0	0	0
0	00:00:00	0	0	0	0	0	0	0	0	0	100	0	0	0.0778	0.63	3.941	1.106	0	0	0	0	0	0	0	0	0	#DIV/0!	0	0	0
0	00:00:00	0	0	0	0	0	0	0	0	0	100	0	0	0.0778	0.63	3.941	1.106	0	0	0	0	0	0	0	0	0	#DIV/0!	0	0	0
0	00:00:00	0	0	0	0	0	0	0	0	0	100	0	0	0.0778	0.63	3.941	1.106	0	0	0	0	0	0	0	0	0	#DIV/0!	0	0	0
0	00:00:00	0	0	0	0	0	0	0	0	0	100	0	0	0.0778	0.63	3.941	1.106	0	0	0	0	0	0	0	0	0	#DIV/0!	0	0	0
0	00:00:00	0	0	0	0	0	0	0	0	0	100	0	0	0.0778	0.63	3.941	1.106	0	0	0	0	0	0	0	0	0	#DIV/0!	0	0	0
0	00:00:00	0	0	0	0	0	0	0	0	0	100	0	0	0.0778	0.63	3.941	1.106	0	0	0	0	0	0	0	0	0	#DIV/0!	0	0	0
0	00:00:00	0	0	0	0	0	0	0	0	0	100	0	0	0.0778	0.63	3.941	1.106	0	0	0	0	0	0	0	0	0	#DIV/0!	0	0	0
0	00:00:00	0	0	0	0	0	0	0	0	0	100	0	0	0.0778	0.63	3.941	1.106	0	0	0	0	0	0	0	0	0	#DIV/0!	0	0	0
0	00:00:00	0	0	0	0	0	0	0	0	0	100	0	0	0.0778	0.63	3.941	1.106	0	0	0	0	0	0	0	0	0	#DIV/0!	0	0	0
0	00:00:00	0	0	0	0	0	0	0	0	0	100	0	0	0.0778	0.63	3.941	1.106	0	0	0	0	0	0	0	0	0	#DIV/0!	0	0	0
0	00:00:00	0	0	0	0	0	0	0	0	0	100	0	0	0.0778	0.63	3.941	1.106	0	0	0	0	0	0	0	0	0	#DIV/0!	0	0	0
0	00:00:00	0	0	0	0	0	0	0	0	0	100	0	0	0.0778	0.63	3.941	1.106	0	0	0	0	0	0	0	0	0	#DIV/0!	0	0	0
0	00:00:00	0	0	0	0	0	0	0	0	0	100	0	0	0.0778	0.63	3.941	1.106	0	0	0	0	0	0	0	0	0	#DIV/0!	0	0	0
0	00:00:00	0	0	0	0	0	0	0	0	0	100	0	0	0.0778	0.63	3.941	1.106	0	0	0	0	0	0	0	0	0	#DIV/0!	0	0	0
0	00:00:00	0	0	0	0	0	0	0	0	0	100	0	0	0.0778	0.63	3.941	1.106	0	0	0	0	0	0	0	0	0	#DIV/0!	0	0	0
0	00:00:00	0	0	0	0	0	0	0	0	0	100	0	0	0.0778	0.63	3.941	1.106	0	0	0	0	0	0	0	0	0	#DIV/0!	0	0	0
0	00:00:00	0	0	0	0	0	0	0	0	0	100	0	0	0.0778	0.63	3.941	1.106	0	0	0	0	0	0	0	0	0	#DIV/0!	0	0	0
0	00:00:00	0	0	0	0	0	0	0	0	0	100	0	0	0.0778	0.63	3.941	1.106	0	0	0	0	0	0	0	0	0	#DIV/0!	0	0	0
0	00:00:00	0	0	0	0	0	0	0	0	0	100	0	0	0.0778	0.63	3.941	1.106	0	0	0	0	0	0	0	0	0	#DIV/0!	0	0	0
0	00:00:00	0	0	0	0	0	0	0	0	0	100	0	0	0.0778	0.63	3.941	1.106	0	0	0	0	0	0	0	0	0	#DIV/0!	0	0	0
0	00:00:00	0	0	0	0	0	0	0	0	0	100	0	0	0.0778	0.63	3.941	1.106	0	0	0	0	0	0	0	0	0	#DIV/0!	0	0	0
0	00:00:00	0	0	0	0	0	0	0	0	0	100	0	0	0.0778	0.63	3.941	1.106	0	0	0	0	0	0	0	0	0	#DIV/0!	0	0	0
0	00:00:00	0	0	0	0	0	0	0	0	0	100	0	0	0.0778	0.63	3.941	1.106	0	0	0	0	0	0	0	0	0	#DIV/0!	0	0	0
0	00:00:00	0	0	0	0	0	0	0	0	0	100	0	0	0.0778	0.63	3.941	1.106	0	0	0	0	0	0	0	0	0	#DIV/0!	0	0	0
0	00:00:00	0	0	0	0	0	0	0	0	0	100	0	0	0.0778	0.63	3.941	1.106	0	0	0	0	0	0	0	0	0	#DIV/0!	0	0	0
0	00:00:00	0	0	0	0	0	0	0	0	0	100	0	0	0.0778	0.63	3.941	1.106	0	0	0	0	0	0	0	0	0	#DIV/0!	0	0	0
0	00:00:00	0	0	0	0	0	0	0	0	0	100	0	0	0.0778	0.63	3.941	1.106	0	0	0	0	0	0	0	0	0	#DIV/0!	0	0	0
0	00:00:00	0	0	0	0	0	0	0	0	0	100	0	0	0.0778	0.63	3.941	1.106	0	0	0	0	0	0	0	0	0	#DIV/0!	0	0	0
0	00:00:00	0	0	0	0	0	0	0	0	0	100	0	0	0.0778	0.63	3.941	1.106	0	0	0	0	0	0	0	0	0	#DIV/0!	0	0	0
0	00:00:00	0	0	0	0	0	0	0	0	0	100	0	0	0.0778	0.63	3.941	1.106	0	0	0	0	0	0	0	0	0	#DIV/0!	0	0	0
0	00:00:00	0	0	0	0	0	0	0	0	0	100	0	0	0.0778	0.63	3.941	1.106	0	0	0	0	0	0	0	0	0	#DIV/0!	0	0	0
0	00:00:00	0	0	0	0	0	0	0	0	0	100	0	0	0.0778	0.63	3.941	1.106	0	0	0	0	0	0	0	0	0	#DIV/0!	0	0	0
0	00:00:00	0	0	0	0	0	0	0	0	0	100	0	0	0.0778	0.63	3.941	1.106	0	0	0	0	0	0	0	0	0	#DIV/0!	0	0	0
0	00:00:00	0	0	0	0	0	0	0	0	0	100	0	0	0.0778	0.63	3.941	1.106	0	0	0	0	0	0	0	0	0	#DIV/0!	0	0	0
0	00:00:00	0	0	0	0	0	0	0	0	0	100	0	0	0.0778	0.63	3.941	1.106	0	0	0	0	0	0	0	0	0	#DIV/0!	0	0	0
0	00:00:00	0	0	0	0	0	0	0	0	0	100	0	0	0.0778	0.63	3.941	1.106	0	0	0	0	0	0	0	0	0	#DIV/0!	0	0	0
0	00:00:00	0	0	0	0	0	0	0	0	0	100	0	0	0.0778	0.63	3.941	1.106	0	0	0	0	0	0	0	0	0	#DIV/0!	0	0	0
0	00:00:00	0	0	0	0	0	0	0	0	0	100	0	0	0.0778	0.63	3.941	1.106	0	0	0	0	0	0	0	0	0	#DIV/0!	0	0	0
0	00:00:00	0	0	0	0	0	0	0	0	0	100	0	0	0.0778	0.63	3.941	1.106	0	0	0	0	0	0	0	0	0	#DIV/0!	0	0	0
0	00:00:00	0	0	0	0	0	0	0	0	0	100	0	0	0.0778	0.63	3.941	1.106	0	0	0	0	0	0	0	0	0	#DIV/0!	0	0	0
0	00:00:00	0	0	0	0	0	0	0	0	0	100	0	0	0.0778	0.63	3.941	1.106	0	0	0	0	0	0	0	0	0	#DIV/0!	0	0	0
0	00:00:00	0	0	0	0	0	0	0	0	0	100	0	0	0.0778	0.63	3.941	1.106	0	0	0	0	0	0	0	0	0	#DIV/0!	0	0	0
0	00:00:00	0	0	0	0	0	0	0	0	0	100	0	0	0.0778	0.63	3.941	1.106	0	0	0	0	0	0	0	0	0	#DIV/0!	0	0	0
0	00:00:00	0	0	0	0	0	0	0	0	0	100	0	0	0.0778	0.63	3.941	1.106	0	0	0	0	0	0	0	0	0	#DIV/0!	0	0	0
0	00:00:00	0	0	0	0	0	0	0	0	0	100	0	0	0.0778	0.63	3.941	1.106	0	0	0	0	0	0	0	0	0	#DIV/0!	0	0	0
0	00:00:00	0	0	0	0	0	0	0	0	0	100	0	0	0.0778	0.63	3.941	1.106	0	0	0	0	0	0	0	0	0	#DIV/0!	0	0	0
0	00:00:00	0	0	0	0	0	0	0	0	0	100	0	0	0.0778	0.63	3.941	1.106	0	0	0	0	0	0	0	0	0	#DIV/0!	0	0	0
0	00:00:00	0	0	0	0	0	0	0	0	0	100	0	0	0.0778	0.63	3.941	1.106	0	0	0	0	0	0	0	0	0	#DIV/0!	0	0	0
0	00:00:00	0	0	0	0	0	0	0	0	0	100	0	0	0.0778	0.63	3.941	1.106	0	0	0	0	0	0	0	0	0	#DIV/0!	0	0	0
0	00:00:00	0	0	0	0	0	0	0	0	0	100	0	0	0.0778	0.63	3.941	1.106	0	0	0	0	0	0	0	0	0	#DIV/0!	0	0	0
0	00:00:00	0	0	0	0	0	0	0	0	0	100	0	0	0.0778	0.63	3.941	1.106	0	0	0	0	0	0	0	0	0	#DIV/0!	0	0	0
0	00:00:00	0	0	0	0	0	0	0	0	0	100	0	0	0.0778	0.63	3.941	1.106	0	0	0	0	0	0	0	0	0	#DIV/0!	0	0	0
0	00:00:00	0	0	0	0	0	0	0	0	0	100	0	0	0.0778	0.63	3.941	1.106	0	0	0	0	0	0	0	0	0	#DIV/0!	0	0	0
0	00:00:00	0	0	0	0	0	0	0	0	0	100	0	0	0.0778	0.63	3.941	1.106	0	0	0	0	0	0	0	0	0	#DIV/0!	0	0	0
0	00:00:00	0	0	0	0	0	0	0	0	0	100	0	0	0.0778	0.63	3.941	1.106	0	0	0	0	0	0	0	0	0	#DIV/0!	0	0	0
0	00:00:00	0	0	0	0	0	0	0	0	0	100	0	0	0.0778	0.63	3.941	1.106	0	0	0	0	0	0	0	0	0	#DIV/0!	0	0	0
0	00:00:00	0	0	0	0	0	0	0	0	0	100	0	0	0.0778	0.63	3.941	1.106	0	0	0	0	0	0	0	0	0	#DIV/0!	0	0	0
0	00:00:00	0	0	0	0	0	0	0	0	0	100	0	0	0.0778	0.63	3.941	1.106	0	0	0	0	0	0	0	0	0	#DIV/0!	0	0	0
0	00:00:00	0	0	0	0	0	0	0	0	0	100	0	0	0.0778	0.63	3.941	1.106	0	0	0	0	0	0	0	0	0	#DIV/0!	0	0	0
0	00:00:00	0	0	0	0	0	0	0	0	0	100	0	0	0.0778	0.63	3.941	1.106	0	0	0	0	0	0	0	0	0	#DIV/0!	0	0	0
0	00:00:00	0	0	0	0	0	0	0	0	0	100	0	0	0.0778	0.63	3.941	1.106	0	0	0	0	0	0	0	0	0	#DIV/0!	0	0	0
0	00:00:00	0	0	0	0	0	0	0	0	0	100	0	0	0.0778	0.63	3.941	1.106	0	0	0	0	0	0	0	0	0	#DIV/0!	0	0	0
0	00:00:00	0	0	0	0	0	0	0	0	0	100	0	0	0.0778	0.63	3.941	1.106	0	0	0	0	0	0	0	0	0	#DIV/0!	0	0	0
0	00:00:00	0	0	0	0	0	0	0	0	0	100	0	0	0.0778	0.63	3.941	1.106	0	0	0	0	0	0	0	0	0	#DIV/0!	0	0	0
0	00:00:00	0	0	0	0	0	0	0	0	0	100	0	0	0.0778	0.63	3.941	1.106	0	0	0	0	0	0	0	0	0	#DIV/0!	0	0	0
0	00:00:00	0	0	0	0	0	0	0	0	0	100	0	0	0.0778	0.63	3.941	1.106	0	0	0	0	0	0	0	0	0	#DIV/0!	0	0	0
0	00:00:00	0	0	0	0	0	0	0	0	0	100	0	0	0.0778	0.63	3.941	1.106	0	0	0	0	0	0	0	0	0	#DIV/0!	0	0	0
0	00:00:00	0	0	0	0	0	0	0	0	0	100	0	0	0.0778	0.63	3.941	1.106	0	0	0	0	0	0	0	0	0	#DIV/0!	0	0	0
0	00:00:00	0	0	0	0	0	0	0	0	0	100	0	0	0.0778	0.63	3.941	1.106	0	0	0	0	0	0	0	0	0	#DIV/0!	0	0	0
0	00:00:00	0	0	0	0	0	0	0	0	0	100	0	0	0.0778	0.63	3.941	1.106	0	0	0	0	0	0	0	0	0	#DIV/0!	0	0	0
0	00:00:00	0	0	0	0	0	0	0	0	0	100	0	0	0.0778	0.63	3.941	1.106	0	0	0	0	0	0	0	0	0	#DIV/0!	0	0	0
0	00:00:00	0	0	0	0	0	0	0	0	0	100	0	0	0.0778	0.63	3.941	1.106	0	0	0	0	0	0	0	0	0	#DIV/0!	0	0	0
0	00:00:00	0	0	0	0	0	0	0	0	0	100	0	0	0.0778	0.63	3.941	1.106	0	0	0	0	0	0	0	0	0	#DIV/0!	0	0	0
0	00:00:00	0	0	0	0	0	0	0	0	0	100	0	0	0.0778	0.63	3.941	1.106	0	0	0	0	0	0	0	0	0	#DIV/0!	0	0	0
0	00:00:00	0	0	0	0	0	0	0	0	0	100	0	0	0.0778	0.63	3.941	1.106	0	0	0	0	0	0	0	0	0	#DIV/0!	0	0	0
0	00:00:00	0	0	0	0	0	0	0	0	0	100	0	0	0.0778	0.63	3.941	1.106	0	0	0	0	0	0	0	0	0	#DIV/0!	0	0	0
0	00:00:00	0	0	0	0	0	0	0	0	0	100	0	0	0.0778	0.63	3.941	1.106	0	0	0	0	0	0	0	0	0	#DIV/0!	0	0	0
0	00:00:00	0	0	0	0	0	0	0	0	0	100	0	0	0.0778	0.63	3.941	1.106	0	0	0	0	0	0	0	0	0	#DIV/0!	0	0	0
0	00:00:00	0	0	0	0	0	0	0	0	0	100	0	0	0.0778	0.63	3.941	1.106	0	0	0	0	0	0	0	0	0	#DIV/0!	0	0	0
0	00:00:00	0	0	0	0	0	0	0	0	0	100	0	0	0.0778	0.63	3.941	1.106	0	0	0	0	0	0	0	0	0	#DIV/0!	0	0	0
0	00:00:00	0	0	0	0	0	0	0	0	0	100	0	0	0.0778	0.63	3.941	1.106	0	0	0	0	0	0	0	0	0	#DIV/0!	0	0	0
0	00:00:00	0	0	0	0	0	0	0	0	0	100	0	0	0.0778	0.63	3.941	1.106	0	0	0	0	0	0	0	0	0	#DIV/0!	0	0	0
0	00:00:00	0	0	0	0	0	0	0	0	0	100	0	0	0.0778	0.63	3.941	1.106	0	0	0	0	0	0	0	0	0	#DIV/0!	0	0	0
0	00:00:00	0	0	0	0	0	0	0	0	0	100	0	0	0.0778	0.63	3.941	1.106	0	0	0	0	0	0	0	0	0	#DIV/0!	0	0	0
0	00:00:00	0	0	0	0	0	0	0	0	0	100	0	0	0.0778	0.63	3.941	1.106	0	0	0	0	0	0	0	0	0	#DIV/0!	0	0	0
0	00:00:00	0	0	0	0	0	0	0	0	0	100	0	0	0.0778	0.63	3.941	1.106	0	0	0	0	0	0	0	0	0	#DIV/0!	0	0	0
0	00:00:00	0	0	0	0	0	0	0	0	0	100	0	0	0.0778	0.63	3.941	1.106	0	0	0	0	0	0	0	0	0	#DIV/0!	0	0	0
0	00:00:00	0	0	0	0	0	0	0	0	0	100	0	0	0.0778	0.63	3.941	1.106	0	0	0	0	0	0	0	0	0	#DIV/0!	0	0	0
0	00:00:00	0	0	0	0	0	0	0	0	0	100	0	0	0.0778	0.63	3.941	1.106	0	0	0	0	0	0	0	0	0	#DIV/0!	0	0	0
0	00:00:00	0	0	0	0	0	0	0	0	0	100	0	0	0.0778	0.63	3.941	1.106	0	0	0	0	0	0	0	0	0	#DIV/0!	0	0	0
0	00:00:00	0	0	0	0	0	0	0	0	0	100	0	0	0.0778	0.63	3.941	1.106	0	0	0	0	0	0	0	0	0	#DIV/0!	0	0	0
0	00:00:00	0	0	0	0	0	0	0	0	0	100	0	0	0.0778	0.63	3.941	1.106	0	0	0	0	0	0	0	0	0	#DIV/0!	0	0	0
0	00:00:00	0	0	0	0	0	0	0	0	0	100	0	0	0.0778	0.63	3.941	1.106	0	0	0	0	0	0	0	0	0	#DIV/0!	0	0	0
0	00:00:00	0	0	0	0	0	0	0	0	0	100	0	0	0.0778	0.63	3.941	1.106	0	0	0	0	0	0	0	0	0	#DIV/0!	0	0	0
0	00:00:00	0	0	0	0	0	0	0	0	0	100	0	0	0.0778	0.63	3.941	1.106	0	0	0	0	0	0	0	0	0	#DIV/0!	0	0	0
0	00:00:00	0	0	0	0	0	0	0	0	0	100	0	0	0.0778	0.63	3.941	1.106	0	0	0	0	0	0	0	0	0	#DIV/0!	0	0	0
0	00:00:00	0	0	0	0	0	0	0	0	0	100	0	0	0.0778	0.63	3.941	1.106	0	0	0	0	0	0	0	0	0	#DIV/0!	0	0	0
0	00:00:00	0	0	0	0	0	0	0	0	0	100	0	0	0.0778	0.63	3.941	1.106	0	0	0	0	0	0	0	0	0	#DIV/0!	0	0	0
0	00:00:00	0	0	0	0	0	0	0	0	0	100	0	0	0.0778	0.63	3.941	1.106	0	0	0	0	0	0	0	0	0	#DIV/0!	0	0	0
0	00:00:00	0	0	0	0	0	0	0	0	0	100	0	0	0.0778	0.63	3.941	1.106	0	0	0	0	0	0	0	0	0	#DIV/0!	0	0	0
0	00:00:00	0	0	0	0	0	0	0	0	0	100	0	0	0.0778	0.63	3.941	1.106	0	0	0	0	0	0	0	0	0	#DIV/0!	0	0	0
0	00:00:00	0	0	0	0	0	0	0	0	0	100	0	0	0.0778	0.63	3.941	1.106	0	0	0	0	0	0	0	0	0	#DIV/0!	0	0	0
0	00:00:00	0	0	0	0	0	0	0	0	0	100	0	0	0.0778	0.63	3.941	1.106	0	0	0	0	0	0	0	0	0	#DIV/0!	0	0	0
0	00:00:00	0	0	0	0	0	0	0	0	0	100	0	0	0.0778	0.63	3.941	1.106	0	0	0	0	0	0	0	0	0	#DIV/0!	0	0	0
0	00:00:00	0	0	0	0	0	0	0	0	0	100	0	0	0.0778	0.63	3.941	1.106	0	0	0	0	0	0	0	0	0	#DIV/0!	0	0	0
0	00:00:00	0	0	0	0	0	0	0	0	0	100	0	0	0.0778	0.63	3.941	1.106	0	0	0	0	0	0	0	0	0	#DIV/0!	0	0	0
0	00:00:00	0	0	0	0	0	0	0	0	0	100	0	0	0.0778	0.63	3.941	1.106	0	0	0	0	0	0	0	0	0	#DIV/0!	0	0	0
0	00:00:00	0	0	0	0	0	0	0	0	0	100	0	0	0.0778	0.63	3.941	1.106	0	0	0	0	0	0	0	0	0	#DIV/0!	0	0	0
0	00:00:00	0	0	0	0	0	0	0	0	0	100	0	0	0.0778	0.63	3.941	1.106	0	0	0	0	0	0	0	0	0	#DIV/0!	0	0	0
0	00:00:00	0	0	0	0	0	0	0	0	0	100	0	0	0.0778	0.63	3.941	1.106	0	0	0	0	0	0	0	0	0	#DIV/0!	0	0	0
0	00:00:00	0	0	0	0	0	0	0	0	0	100	0	0	0.0778	0.63	3.941	1.106	0	0	0	0	0	0	0	0	0	#DIV/0!	0	0	0
0	00:00:00	0	0	0	0	0	0	0	0	0	100	0	0	0.0778	0.63	3.941	1.106	0	0	0	0	0	0	0	0	0	#DIV/0!	0	0	0
0	00:00:00	0	0	0	0	0	0	0	0	0	100	0	0	0.0778	0.63	3.941	1.106	0	0	0	0	0	0	0	0	0	#DIV/0!	0	0	0
0	00:00:00	0	0	0	0	0	0	0	0	0	100	0	0	0.0778	0.63	3.941	1.106	0	0	0	0	0	0	0	0	0	#DIV/0!	0	0	0
0	00:00:00	0	0	0	0	0	0	0	0	0	100	0	0	0.0778	0.63	3.941	1.106	0	0	0	0	0	0	0	0	0	#DIV/0!	0	0	0
0	00:00:00	0	0	0	0	0	0	0	0	0	100	0	0	0.0778	0.63	3.941	1.106	0	0	0	0	0	0	0	0	0	#DIV/0!	0	0	0
0	00:00:00	0	0	0	0	0	0	0	0	0	100	0	0	0.0778	0.63	3.941	1.106	0	0	0	0	0	0	0	0	0	#DIV/0!	0	0	0
0	00:00:00	0	0	0	0	0	0	0	0	0	100	0	0	0.0778	0.63	3.941	1.106	0	0	0	0	0	0	0	0	0	#DIV/0!	0	0	0
0	00:00:00	0	0	0	0	0	0	0	0	0	100	0	0	0.0778	0.63	3.941	1.106	0	0	0	0	0	0	0	0	0	#DIV/0!	0	0	0
0	00:00:00	0	0	0	0	0	0	0	0	0	100	0	0	0.0778	0.63	3.941	1.106	0	0	0	0	0	0	0	0	0	#DIV/0!	0	0	0
0	00:00:00	0	0	0	0	0	0	0	0	0	100	0	0	0.0778	0.63	3.941	1.106	0	0	0	0	0	0	0	0	0	#DIV/0!	0	0	0
0	00:00:00	0	0	0	0	0	0	0	0	0	100	0	0	0.0778	0.63	3.941	1.106	0	0	0	0	0	0	0	0	0	#DIV/0!	0	0	0
0	00:00:00	0	0	0	0	0	0	0	0	0	100	0	0	0.0778	0.63	3.941	1.106	0	0	0	0	0	0	0	0	0	#DIV/0!	0	0	0
0	00:00:00	0	0	0	0	0	0	0	0	0	100	0	0	0.0778	0.63	3.941	1.106	0	0	0	0	0	0	0	0	0	#DIV/0!	0	0	0
0	00:00:00	0	0	0	0	0	0	0	0	0	100	0	0	0.0778	0.63	3.941	1.106	0	0	0	0	0	0	0	0	0	#DIV/0!	0	0	0
0	00:00:00	0	0	0	0	0	0	0	0	0	100	0	0	0.0778	0.63	3.941	1.106	0	0	0	0	0	0	0	0	0	#DIV/0!	0	0	0
0	00:00:00	0	0	0	0	0	0	0	0	0	100	0	0	0.0778	0.63	3.941	1.106	0	0	0	0	0	0	0	0	0	#DIV/0!	0	0	0
0	00:00:00	0	0	0	0	0	0	0	0	0	100	0	0	0.0778	0.63	3.941	1.106	0	0	0	0	0	0	0	0	0	#DIV/0!	0	0	0
0	00:00:00	0	0	0	0	0	0	0	0	0	100	0	0	0.0778	0.63	3.941	1.106	0	0	0	0	0	0	0	0	0	#DIV/0!	0	0	0
0	00:00:00	0	0	0	0	0	0	0	0	0	100	0	0	0.0778	0.63	3.941	1.106	0	0	0	0	0	0	0	0	0	#DIV/0!	0	0	0
0	00:00:00	0	0	0	0	0	0	0	0	0	100	0	0	0.0778	0.63	3.941	1.106	0	0	0	0	0	0	0	0	0	#DIV/0!	0	0	0
0	00:00:00	0	0	0	0	0	0	0	0	0	100	0	0	0.0778	0.63	3.941	1.106	0	0	0	0	0	0	0	0	0	#DIV/0!	0	0	0
0	00:00:00	0	0	0	0	0	0	0	0	0	100	0	0	0.0778	0.63	3.941	1.106	0	0	0	0	0	0	0	0	0	#DIV/0!	0	0	0
0	00:00:00	0	0	0	0	0	0	0	0	0	100	0	0	0.0778	0.63	3.941	1.106	0	0	0	0	0	0	0	0	0	#DIV/0!	0	0	0
0	00:00:00	0	0	0	0	0	0	0	0	0	100	0	0	0.0778	0.63	3.941	1.106	0	0	0	0	0	0	0	0	0	#DIV/0!	0	0	0
0	00:00:00	0	0	0	0	0	0	0	0	0	100	0	0	0.0778	0.63	3.941	1.106	0	0	0	0	0	0	0	0	0	#DIV/0!	0	0	0
0	00:00:00	0	0	0	0	0	0	0	0	0	100	0	0	0.0778	0.63	3.941	1.106	0	0	0	0	0	0	0	0	0	#DIV/0!	0	0	0
0	00:00:00	0	0	0	0	0	0	0	0	0	100	0	0	0.0778	0.63	3.941	1.106	0	0	0	0	0	0	0	0	0	#DIV/0!	0	0	0
0	00:00:00	0	0	0	0	0	0	0	0	0	100	0	0	0.0778	0.63	3.941	1.106	0	0	0	0	0	0	0	0	0	#DIV/0!	0	0	0
0	00:00:00	0	0	0	0	0	0	0	0	0	100	0	0	0.0778	0.63	3.941	1.106	0	0	0	0	0	0	0	0	0	#DIV/0!	0	0	0
0	00:00:00	0	0	0	0	0	0	0	0	0	100	0	0	0.0778	0.63	3.941	1.106	0	0	0	0	0	0	0	0	0	#DIV/0!	0	0	0
0	00:00:00	0	0	0	0	0	0	0	0	0	100	0	0	0.0778	0.63	3.941	1.106	0	0	0	0	0	0	0	0	0	#DIV/0!	0	0	0
0	00:00:00	0	0	0	0	0	0	0	0	0	100	0	0	0.0778	0.63	3.941	1.106	0	0	0	0	0	0	0	0	0	#DIV/0!	0	0	0
0	00:00:00	0	0	0	0	0	0	0	0	0	100	0	0	0.0778	0.63	3.941	1.106	0	0	0	0	0	0	0	0	0	#DIV/0!	0	0	0
0	00:00:00	0	0	0	0	0	0	0	0	0	100	0	0	0.0778	0.63	3.941	1.106	0	0	0	0	0	0	0	0	0	#DIV/0!	0	0	0
0	00:00:00	0	0	0	0	0	0	0	0	0	100	0	0	0.0778	0.63	3.941	1.106	0	0	0	0	0	0	0	0	0	#DIV/0!	0	0	0
0	00:00:00	0	0	0	0	0	0	0	0	0	100	0	0	0.0778	0.63	3.941	1.106	0	0	0	0	0	0	0	0	0	#DIV/0!	0	0	0
0	00:00:00	0	0	0	0	0	0	0	0	0	100	0	0	0.0778	0.63	3.941	1.106	0	0	0	0	0	0	0	0	0	#DIV/0!	0	0	0
0	00:00:00	0	0	0	0	0	0	0	0	0	100	0	0	0.0778	0.63	3.941	1.106	0	0	0	0	0	0	0	0	0	#DIV/0!	0	0	0
0	00:00:00	0	0	0	0	0	0	0	0	0	100	0	0	0.0778	0.63	3.941	1.106	0	0	0	0	0	0	0	0	0	#DIV/0!	0	0	0
0	00:00:00	0	0	0	0	0	0	0	0	0	100	0	0	0.0778	0.63	3.941	1.106	0	0	0	0	0	0	0	0	0	#DIV/0!	0	0	0
0	00:00:00	0	0	0	0	0	0	0	0	0	100	0	0	0.0778	0.63	3.941	1.106	0	0	0	0	0	0	0	0	0	#DIV/0!	0	0	0
0	00:00:00	0	0	0	0	0	0	0	0	0	100	0	0	0.0778	0.63	3.941	1.106	0	0	0	0	0	0	0	0	0	#DIV/0!	0	0	0
0	00:00:00	0	0	0	0	0	0	0	0	0	100	0	0	0.0778	0.63	3.941	1.106	0	0	0	0	0	0	0	0	0	#DIV/0!	0	0	0
0	00:00:00	0	0	0	0	0	0	0	0	0	100	0	0	0.0778	0.63	3.941	1.106	0	0	0	0	0	0	0	0	0	#DIV/0!	0	0	0
0	00:00:00	0	0	0	0	0	0	0	0	0	100	0	0	0.0778	0.63	3.941	1.106	0	0	0	0	0	0	0	0	0	#DIV/0!	0	0	0
0	00:00:00	0	0	0	0	0	0	0	0	0	100	0	0	0.0778	0.63	3.941	1.106	0	0	0	0	0	0	0	0	0	#DIV/0!	0	0	0
0	00:00:00	0	0	0	0	0	0	0	0	0	100	0	0	0.0778	0.63	3.941	1.106	0	0	0	0	0	0	0	0	0	#DIV/0!	0	0	0
0	00:00:00	0	0	0	0	0	0	0	0	0	100	0	0	0.0778	0.63	3.941	1.106	0	0	0	0	0	0	0	0	0	#DIV/0!	0	0	0
0	00:00:00	0	0	0	0	0	0	0	0	0	100	0	0	0.0778	0.63	3.941	1.106	0	0	0	0	0	0	0	0	0	#DIV/0!	0	0	0
0	00:00:00	0	0	0	0	0	0	0	0	0	100	0	0	0.0778	0.63	3.941	1.106	0	0	0	0	0	0	0	0	0	#DIV/0!	0	0	0
0	00:00:00	0	0	0	0	0	0	0	0	0	100	0	0	0.0778	0.63	3.941	1.106	0	0	0	0	0	0	0	0	0	#DIV/0!	0	0	0
0	00:00:00	0	0	0	0	0	0	0	0	0	100	0	0	0.0778	0.63	3.941	1.106	0	0	0	0	0	0	0	0	0	#DIV/0!	0	0	0
0	00:00:00	0	0	0	0	0	0	0	0	0	100	0	0	0.0778	0.63	3.941	1.106	0	0	0	0	0	0	0	0	0	#DIV/0!	0	0	0
0	00:00:00	0	0	0	0	0	0	0	0	0	100	0	0	0.0778	0.63	3.941	1.106	0	0	0	0	0	0	0	0	0	#DIV/0!	0	0	0
0	00:00:00	0	0	0	0	0	0	0	0	0	100	0	0	0.0778	0.63	3.941	1.106	0	0	0	0	0	0	0	0	0	#DIV/0!	0	0	0
0	00:00:00	0	0	0	0	0	0	0	0	0	100	0	0	0.0778	0.63	3.941	1.106	0	0	0	0	0	0	0	0	0	#DIV/0!	0	0	0
0	00:00:00	0	0	0	0	0	0	0	0	0	100	0	0	0.0778	0.63	3.941	1.106	0	0	0	0	0	0	0	0	0	#DIV/0!	0	0	0
0	00:00:00	0	0	0	0	0	0	0	0	0	100	0	0	0.0778	0.63	3.941	1.106	0	0	0	0	0	0	0	0	0	#DIV/0!	0	0	0
0	00:00:00	0	0	0	0	0	0	0	0	0	100	0	0	0.0778	0.63	3.941	1.106	0	0	0	0	0	0	0	0	0	#DIV/0!	0	0	0
0	00:00:00	0	0	0	0	0	0	0	0	0	100	0	0	0.0778	0.63	3.941	1.106	0	0	0	0	0	0	0	0	0	#DIV/0!	0	0	0
0	00:00:00	0	0	0	0	0	0	0	0	0	100	0	0	0.0778	0.63	3.941	1.106	0	0	0	0	0	0	0	0	0	#DIV/0!	0	0	0
0	00:00:00	0	0	0	0	0	0	0	0	0	100	0	0	0.0778	0.63	3.941	1.106	0	0	0	0	0	0	0	0	0	#DIV/0!	0	0	0
0	00:00:00	0	0	0	0	0	0	0	0	0	100	0	0	0.0778	0.63	3.941	1.106	0	0	0	0	0	0	0	0	0	#DIV/0!	0	0	0
0	00:00:00	0	0	0	0	0	0	0	0	0	100	0	0	0.0778	0.63	3.941	1.106	0	0	0	0	0	0	0	0	0	#DIV/0!	0	0	0
0	00:00:00	0	0	0	0	0	0	0	0	0	100	0	0	0.0778	0.63	3.941	1.106	0	0	0	0	0	0	0	0	0	#DIV/0!	0	0	0
0	00:00:00	0	0	0	0	0	0	0	0	0	100	0	0	0.0778	0.63	3.941	1.106	0	0	0	0	0	0	0	0	0	#DIV/0!	0	0	0
0	00:00:00	0	0	0	0	0	0	0	0	0	100	0	0	0.0778	0.63	3.941	1.106	0	0	0	0	0	0	0	0	0	#DIV/0!	0	0	0
0	00:00:00	0	0	0	0	0	0	0	0	0	100	0	0	0.0778	0.63	3.941	1.106	0	0	0	0	0	0	0	0	0	#DIV/0!	0	0	0
0	00:00:00	0	0	0	0	0	0	0	0	0	100	0	0	0.0778	0.63	3.941	1.106	0	0	0	0	0	0	0	0	0	#DIV/0!	0	0	0
0	00:00:00	0	0	0	0	0	0	0	0	0	100	0	0	0.0778	0.63	3.941	1.106	0	0	0	0	0	0	0	0	0	#DIV/0!	0	0	0
0	00:00:00	0	0	0	0	0	0	0	0	0	100	0	0	0.0778	0.63	3.941	1.106	0	0	0	0	0	0	0	0	0	#DIV/0!	0	0	0
0	00:00:00	0	0	0	0	0	0	0	0	0	100	0	0	0.0778	0.63	3.941	1.106	0	0	0	0	0	0	0	0	0	#DIV/0!	0	0	0
0	00:00:00	0	0	0	0	0	0	0	0	0	100	0	0	0.0778	0.63	3.941	1.106	0	0	0	0	0	0	0	0	0	#DIV/0!	0	0	0
0	00:00:00	0	0	0	0	0	0	0	0	0	100	0	0	0.0778	0.63	3.941	1.106	0	0	0	0	0	0	0	0	0	#DIV/0!	0	0	0
0	00:00:00	0	0	0	0	0	0	0	0	0	100	0	0	0.0778	0.63	3.941	1.106	0	0	0	0	0	0	0	0	0	#DIV/0!	0	0	0
0	00:00:00	0	0	0	0	0	0	0	0	0	100	0	0	0.0778	0.63	3.941	1.106	0	0	0	0	0	0	0	0	0	#DIV/0!	0	0	0
0	00:00:00	0	0	0	0	0	0	0	0	0	100	0	0	0.0778	0.63	3.941	1.106	0	0	0	0	0	0	0	0	0	#DIV/0!	0	0	0
0	00:00:00	0	0	0	0	0	0	0	0	0	100	0	0	0.0778	0.63	3.941	1.106	0	0	0	0	0	0	0	0	0	#DIV/0!	0	0	0
0	00:00:00	0	0	0	0	0	0	0	0	0	100	0	0	0.0778	0.63	3.941	1.106	0	0	0	0	0	0	0	0	0	#DIV/0!	0	0	0
0	00:00:00	0	0	0	0	0	0	0	0	0	100	0	0	0.0778	0.63	3.941	1.106	0	0	0	0	0	0	0	0	0	#DIV/0!	0	0	0
0	00:00:00	0	0	0	0	0	0	0	0	0	100	0	0	0.0778	0.63	3.941	1.106	0	0	0	0	0	0	0	0	0	#DIV/0!	0	0	0
0	00:00:00	0	0	0	0	0	0	0	0	0	100	0	0	0.0778	0.63	3.941	1.106	0	0	0	0	0	0	0	0	0	#DIV/0!	0	0	0
0	00:00:00	0	0	0	0	0	0	0	0	0	100	0	0	0.0778	0.63	3.941	1.106	0	0	0	0	0	0	0	0	0	#DIV/0!	0	0	0
0	00:00:00	0	0	0	0	0	0	0	0	0	100	0	0	0.0778	0.63	3.941	1.106	0	0	0	0	0	0	0	0	0	#DIV/0!	0	0	0
0	00:00:00	0	0	0	0	0	0	0	0	0	100	0	0	0.0778	0.63	3.941	1.106	0	0	0	0	0	0	0	0	0	#DIV/0!	0	0	0
0	00:00:00	0	0	0	0	0	0	0	0	0	100	0	0	0.0778	0.63	3.941	1.106	0	0	0	0	0	0	0	0	0	#DIV/0!	0	0	0
0	00:00:00	0	0	0	0	0	0	0	0	0	100	0	0	0.0778	0.63	3.941	1.106	0	0	0	0	0	0	0	0	0	#DIV/0!	0	0	0
0	00:00:00	0	0	0	0	0	0	0	0	0	100	0	0	0.0778	0.63	3.941	1.106	0	0	0	0	0	0	0	0	0	#DIV/0!	0	0	0
0	00:00:00	0	0	0	0	0	0	0	0	0	100	0	0	0.0778	0.63	3.941	1.106	0	0	0	0	0	0	0	0	0	#DIV/0!	0	0	0
0	00:00:00	0	0	0	0	0	0	0	0	0	100	0	0	0.0778	0.63	3.941	1.106	0	0	0	0	0	0	0	0	0	#DIV/0!	0	0	0
0	00:00:00	0	0	0	0	0	0	0	0	0	100	0	0	0.0778	0.63	3.941	1.106	0	0	0	0	0	0	0	0	0	#DIV/0!	0	0	0
0	00:00:00	0	0	0	0	0	0	0	0	0	100	0	0	0.0778	0.63	3.941	1.106	0	0	0	0	0	0	0	0	0	#DIV/0!	0	0	0
0	00:00:00	0	0	0	0	0	0	0	0	0	100	0	0	0.0778	0.63	3.941	1.106	0	0	0	0	0	0	0	0	0	#DIV/0!	0	0	0
0	00:00:00	0	0	0	0	0	0	0	0	0	100	0	0	0.0778	0.63	3.941	1.106	0	0	0	0	0	0	0	0	0	#DIV/0!	0	0	0
0	00:00:00	0	0	0	0	0	0	0	0	0	100	0	0	0.0778	0.63	3.941	1.106	0	0	0	0	0	0	0	0	0	#DIV/0!	0	0	0
0	00:00:00	0	0	0	0	0	0	0	0	0	100	0	0	0.0778	0.63	3.941	1.106	0	0	0	0	0	0	0	0	0	#DIV/0!	0	0	0
0	00:00:00	0	0	0	0	0	0	0	0	0	100	0	0	0.0778	0.63	3.941	1.106	0	0	0	0	0	0	0	0	0	#DIV/0!	0	0	0
0	00:00:00	0	0	0	0	0	0	0	0	0	100	0	0	0.0778	0.63	3.941	1.106	0	0	0	0	0	0	0	0	0	#DIV/0!	0	0	0
0	00:00:00	0	0	0	0	0	0	0	0	0	100	0	0	0.0778	0.63	3.941	1.106	0	0	0	0	0	0	0	0	0	#DIV/0!	0	0	0
0	00:00:00	0	0	0	0	0	0	0	0	0	100	0	0	0.0778	0.63	3.941	1.106	0	0	0	0	0	0	0	0	0	#DIV/0!	0	0	0
0	00:00:00	0	0	0	0	0	0	0	0	0	100	0	0	0.0778	0.63	3.941	1.106	0	0	0	0	0	0	0	0	0	#DIV/0!	0	0	0
0	00:00:00	0	0	0	0	0	0	0	0	0	100	0	0	0.0778	0.63	3.941	1.106	0	0	0	0	0	0	0	0	0	#DIV/0!	0	0	0
0	00:00:00	0	0	0	0	0	0	0	0	0	100	0	0	0.0778	0.63	3.941	1.106	0	0	0	0	0	0	0	0	0	#DIV/0!	0	0	0
0	00:00:00	0	0	0	0	0	0	0	0	0	100	0	0	0.0778	0.63	3.941	1.106	0	0	0	0	0	0	0	0	0	#DIV/0!	0	0	0
0	00:00:00	0	0	0	0	0	0	0	0	0	100	0	0	0.0778	0.63	3.941	1.106	0	0	0	0	0	0	0	0	0	#DIV/0!	0	0	0
0	00:00:00	0	0	0	0	0	0	0	0	0	100	0	0	0.0778	0.63	3.941	1.106	0	0	0	0	0	0	0	0	0	#DIV/0!	0	0	0
0	00:00:00	0	0	0	0	0	0	0	0	0	100	0	0	0.0778	0.63	3.941	1.106	0	0	0	0	0	0	0	0	0	#DIV/0!	0	0	0
0	00:00:00	0	0	0	0	0	0	0	0	0	100	0	0	0.0778	0.63	3.941	1.106	0	0	0	0	0	0	0	0	0	#DIV/0!	0	0	0
0	00:00:00	0	0	0	0	0	0	0	0	0	100	0	0	0.0778	0.63	3.941	1.106	0	0	0	0	0	0	0	0	0	#DIV/0!	0	0	0
0	00:00:00	0	0	0	0	0	0	0	0	0	100	0	0	0.0778	0.63	3.941	1.106	0	0	0	0	0	0	0	0	0	#DIV/0!	0	0	0
0	00:00:00	0	0	0	0	0	0	0	0	0	100	0	0	0.0778	0.63	3.941	1.106	0	0	0	0	0	0	0	0	0	#DIV/0!	0	0	0
0	00:00:00	0	0	0	0	0	0	0	0	0	100	0	0	0.0778	0.63	3.941	1.106	0	0	0	0	0	0	0	0	0	#DIV/0!	0	0	0
0	00:00:00	0	0	0	0	0	0	0	0	0	100	0	0	0.0778	0.63	3.941	1.106	0	0	0	0	0	0	0	0	0	#DIV/0!	0	0	0
0	00:00:00	0	0	0	0	0	0	0	0	0	100	0	0	0.0778	0.63	3.941	1.106	0	0	0	0	0	0	0	0	0	#DIV/0!	0	0	0
0	00:00:00	0	0	0	0	0	0	0	0	0	100	0	0	0.0778	0.63	3.941	1.106	0	0	0	0	0	0	0	0	0	#DIV/0!	0	0	0
0	00:00:00	0	0	0	0	0	0	0	0	0	100	0	0	0.0778	0.63	3.941	1.106	0	0	0	0	0	0	0	0	0	#DIV/0!	0	0	0
0	00:00:00	0	0	0	0	0	0	0	0	0	100	0	0	0.0778	0.63	3.941	1.106	0	0	0	0	0	0	0	0	0	#DIV/0!	0	0	0
0	00:00:00	0	0	0	0	0	0	0	0	0	100	0	0	0.0778	0.63	3.941	1.106	0	0	0	0	0	0	0	0	0	#DIV/0!	0	0	0
0	00:00:00	0	0	0	0	0	0	0	0	0	100	0	0	0.0778	0.63	3.941	1.106	0	0	0	0	0	0	0	0	0	#DIV/0!	0	0	0
0	00:00:00	0	0	0	0	0	0	0	0	0	100	0	0	0.0778	0.63	3.941	1.106	0	0	0	0	0	0	0	0	0	#DIV/0!	0	0	0
0	00:00:00	0	0	0	0	0	0	0	0	0	100	0	0	0.0778	0.63	3.941	1.106	0	0	0	0	0	0	0	0	0	#DIV/0!	0	0	0
0	00:00:00	0	0	0	0	0	0	0	0	0	100	0	0	0.0778	0.63	3.941	1.106	0	0	0	0	0	0	0	0	0	#DIV/0!	0	0	0
0	00:00:00	0	0	0	0	0	0	0	0	0	100	0	0	0.0778	0.63	3.941	1.106	0	0	0	0	0	0	0	0	0	#DIV/0!	0	0	0
0	00:00:00	0	0	0	0	0	0	0	0	0	100	0	0	0.0778	0.63	3.941	1.106	0	0	0	0	0	0	0	0	0	#DIV/0!	0	0	0
0	00:00:00	0	0	0	0	0	0	0	0	0	100	0	0	0.0778	0.63	3.941	1.106	0	0	0	0	0	0	0	0	0	#DIV/0!	0	0	0
0	00:00:00	0	0	0	0	0	0	0	0	0	100	0	0	0.0778	0.63	3.941	1.106	0	0	0	0	0	0	0	0	0	#DIV/0!	0	0	0
0	00:00:00	0	0	0	0	0	0	0	0	0	100	0	0	0.0778	0.63	3.941	1.106	0	0	0	0	0	0	0	0	0	#DIV/0!	0	0	0
0	00:00:00	0	0	0	0	0	0	0	0	0	100	0	0	0.0778	0.63	3.941	1.106	0	0	0	0	0	0	0	0	0	#DIV/0!	0	0	0
0	00:00:00	0	0	0	0	0	0	0	0	0	100	0	0	0.0778	0.63	3.941	1.106	0	0	0	0	0	0	0	0	0	#DIV/0!	0	0	0
0	00:00:00	0	0	0	0	0	0	0	0	0	100	0	0	0.0778	0.63	3.941	1.106	0	0	0	0	0	0	0	0	0	#DIV/0!	0	0	0
0	00:00:00	0	0	0	0	0	0	0	0	0	100	0	0	0.0778	0.63	3.941	1.106	0	0	0	0	0	0	0	0	0	#DIV/0!	0	0	0
0	00:00:00	0	0	0	0	0	0	0	0	0	100	0	0	0.0778	0.63	3.941	1.106	0	0	0	0	0	0	0	0	0	#DIV/0!	0	0	0
0	00:00:00	0	0	0	0	0	0	0	0	0	100	0	0	0.0778	0.63	3.941	1.106	0	0	0	0	0	0	0	0	0	#DIV/0!	0	0	0
0	00:00:00	0	0	0	0	0	0	0	0	0	100	0	0	0.0778	0.63	3.941	1.106	0	0	0	0	0	0	0	0	0	#DIV/0!	0	0	0
0	00:00:00	0	0	0	0	0	0	0	0	0	100	0	0	0.0778	0.63	3.941	1.106	0	0	0	0	0	0	0	0	0	#DIV/0!	0	0	0
0	00:00:00	0	0	0	0	0	0	0	0	0	100	0	0	0.0778	0.63	3.941	1.106	0	0	0	0	0	0	0	0	0	#DIV/0!	0	0	0
0	00:00:00	0	0	0	0	0	0	0	0	0	100	0	0	0.0778	0.63	3.941	1.106	0	0	0	0	0	0	0	0	0	#DIV/0!	0	0	0
0	00:00:00	0	0	0	0	0	0	0	0	0	100	0	0	0.0778	0.63	3.941	1.106	0	0	0	0	0	0	0	0	0	#DIV/0!	0	0	0
0	00:00:00	0	0	0	0	0	0	0	0	0	100	0	0	0.0778	0.63	3.941	1.106	0	0	0	0	0	0	0	0	0	#DIV/0!	0	0	0
0	00:00:00	0	0	0	0	0	0	0	0	0	100	0	0	0.0778	0.63	3.941	1.106	0	0	0	0	0	0	0	0	0	#DIV/0!	0	0	0
0	00:00:00	0	0	0	0	0	0	0	0	0	100	0	0	0.0778	0.63	3.941	1.106	0	0	0	0	0	0	0	0	0	#DIV/0!	0	0	0
0	00:00:00	0	0	0	0	0	0	0	0	0	100	0	0	0.0778	0.63	3.941	1.106	0	0	0	0	0	0	0	0	0	#DIV/0!	0	0	0
0	00:00:00	0	0	0	0	0	0	0	0	0	100	0	0	0.0778	0.63	3.941	1.106	0	0	0	0	0	0	0	0	0	#DIV/0!	0	0	0
0	00:00:00	0	0	0	0	0	0	0	0	0	100	0	0	0.0778	0.63	3.941	1.106	0	0	0	0	0	0	0	0	0	#DIV/0!	0	0	0
0	00:00:00	0	0	0	0	0	0	0	0	0	100	0	0	0.0778	0.63	3.941	1.106	0	0	0	0	0	0	0	0	0	#DIV/0!	0	0	0
0	00:00:00	0	0	0	0	0	0	0	0	0	100	0	0	0.0778	0.63	3.941	1.106	0	0	0	0	0	0	0	0	0	#DIV/0!	0	0	0
0	00:00:00	0	0	0	0	0	0	0	0	0	100	0	0	0.0778	0.63	3.941	1.106	0	0	0	0	0	0	0	0	0	#DIV/0!	0	0	0
0	00:00:00	0	0	0	0	0	0	0	0	0	100	0	0	0.0778	0.63	3.941	1.106	0	0	0	0	0	0	0	0	0	#DIV/0!	0	0	0
0	00:00:00	0	0	0	0	0	0	0	0	0	100	0	0	0.0778	0.63	3.941	1.106	0	0	0	0	0	0	0	0	0	#DIV/0!	0	0	0
0	00:00:00	0	0	0	0	0	0	0	0	0	100	0	0	0.0778	0.63	3.941	1.106	0	0	0	0	0	0	0	0	0	#DIV/0!	0	0	0
0	00:00:00	0	0	0	0	0	0	0	0	0	100	0	0	0.0778	0.63	3.941	1.106	0	0	0	0	0	0	0	0	0	#DIV/0!	0	0	0
0	00:00:00	0	0	0	0	0	0	0	0	0	100	0	0	0.0778	0.63	3.941	1.106	0	0	0	0	0	0	0	0	0	#DIV/0!	0	0	0
0	00:00:00	0	0	0	0	0	0	0	0	0	100	0	0	0.0778	0.63	3.941	1.106	0	0	0	0	0	0	0	0	0	#DIV/0!	0	0	0
0	00:00:00	0	0	0	0	0	0	0	0	0	100	0	0	0.0778	0.63	3.941	1.106	0	0	0	0	0	0	0	0	0	#DIV/0!	0	0	0
0	00:00:00	0	0	0	0	0	0	0	0	0	100	0	0	0.0778	0.63	3.941	1.106	0	0	0	0	0	0	0	0	0	#DIV/0!	0	0	0
0	00:00:00	0	0	0	0	0	0	0	0	0	100	0	0	0.0778	0.63	3.941	1.106	0	0	0	0	0	0	0	0	0	#DIV/0!	0	0	0
0	00:00:00	0	0	0	0	0	0	0	0	0	100	0	0	0.0778	0.63	3.941	1.106	0	0	0	0	0	0	0	0	0	#DIV/0!	0	0	0
0	00:00:00	0	0	0	0	0	0	0	0	0	100	0	0	0.0778	0.63	3.941	1.106	0	0	0	0	0	0	0	0	0	#DIV/0!	0	0	0
0	00:00:00	0	0	0	0	0	0	0	0	0	100	0	0	0.0778	0.63	3.941	1.106	0	0	0	0	0	0	0	0	0	#DIV/0!	0	0	0
0	00:00:00	0	0	0	0	0	0	0	0	0	100	0	0	0.0778	0.63	3.941	1.106	0	0	0	0	0	0	0	0	0	#DIV/0!	0	0	0
0	00:00:00	0	0	0	0	0	0	0	0	0	100	0	0	0.0778	0.63	3.941	1.106	0	0	0	0	0	0	0	0	0	#DIV/0!	0	0	0
0	00:00:00	0	0	0	0	0	0	0	0	0	100	0	0	0.0778	0.63	3.941	1.106	0	0	0	0	0	0	0	0	0	#DIV/0!	0	0	0
0	00:00:00	0	0	0	0	0	0	0	0	0	100	0	0	0.0778	0.63	3.941	1.106	0	0	0	0	0	0	0	0	0	#DIV/0!	0	0	0
0	00:00:00	0	0	0	0	0	0	0	0	0	100	0	0	0.0778	0.63	3.941	1.106	0	0	0	0	0	0	0	0	0	#DIV/0!	0	0	0

## Sheet: Calculations
	Calculated Data		Formulas (Equations)		Formulas (Excel)
	N2 ref%		=100-(RefO2%+RefCO2%)		=100-(Fn+Gn)
	V1		=N2Ref * dO2		=Ln*Tn
	V2		=O2Ref * (dO2 - dCO2)		=Jn*(Tn-Un)
	Weight	[kg]			=‘Input data2'!Cn/1000
	LBM				='Input Data2'!Dn
	CVO2		constant usually		=3.941																		#DIV/0!
	CVCO2		constant usually		=1.106
	Flow	[ml/h]	=Flow (l/min)*1000* 60		=Hn*1000*60
	dO2	[%]	=O2Ref[%] - O2[%]		=Fn-Jn
	dCO2	[%]	=CO2[%] - CO2Ref[%]		=Kn-Gn
	VO2(1)	[ml/h/kg]	=FlowML * (V1 + V2) / (N2Ref * Weight * 100)		=Sn*(Mn+Nn)/(Ln*On*100)
	VO2(2)	[ml/h/kg]	=FlowML * (V1 + V2) / (N2Ref * Weight^LBM * 100)		=Sn*(Mn+Nn)/(Ln*(On^Pn)*100)
	VO2(3)	[ml/h]	=FlowML * (V1+V2) / (N2Ref *100)		=Sn*(Mn+Nn)/(Ln*100)
	VCO2(1)	[ml/h/kg]	=FlowML * dCO2 / (Weight * 100)		=Sn*Un/(On*100)
	VCO2(2)	[ml/h/kg]	=FlowML * dCO2 / (Weight^LBM * 100)		=Sn*Un/(On^Pn*100)
	VCO2(3)	[ml/h]	=FlowML * dCO2 / 100		=Sn*Un/100
	RER		=VCO2 / VO2		=Yn/Vn
	EE2	[kcal/h/kg]	= (CVO2 * VO2(1) + CVCO2 * VCO2(1)) / 1000		=(Qn*Vn+Rn*Yn)/1000
	EE3	[kcal/h/kg]	= (CVO2 * VO2(2) + CVCO2 * VCO2(2)) / 1000		=(Qn*Wn+Rn*Zn)/1000
	EE1	[kcal/h]	= (CVO2 * VO2(3) + CVCO2 * VCO2(3)) / 1000		=(Qn*Xn+Rn*AAn)/1000
	RER - Value
	Value "Standard"		0,7-1,0
	Carbohydrate		1
	Fat		0.7
